# Supplementary material for: Hyperbranched polyethylenimine based polyamine-N-oxide-carboxylate chelates of gadolinium for high relaxivity MRI contrast agents
Source: Royal Society of Chemistry journal article supplement (doi:10.1039/c6ra03589b), 2016-01-01
Supplement: c6ra03589b1.pdf [file c6ra03589b1.pdf]

## Supporting Information

### Hyperbranched polyethylenimine based polyamine-N-oxide-carboxylate chelates of gadolinium for high relaxivity MRI contrast agents

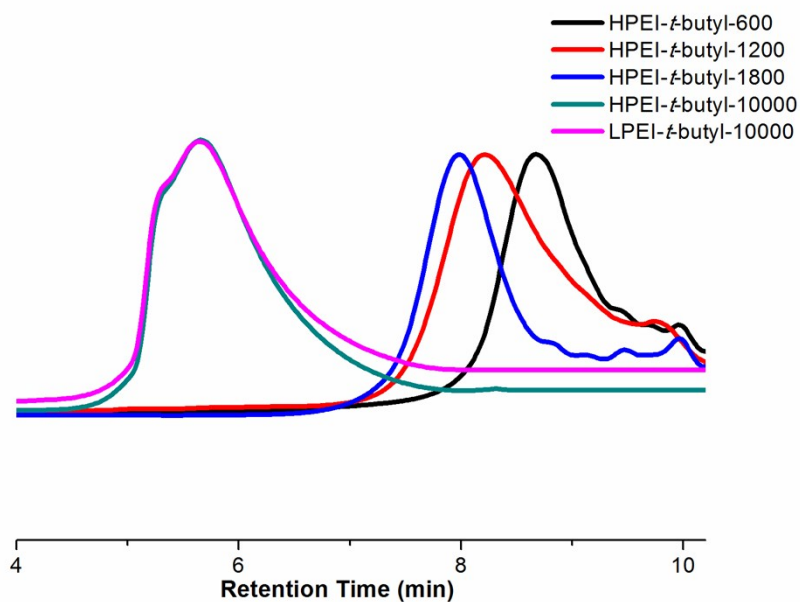

Fig. S1 GPC spectra of PEI-t-butyl molecules.

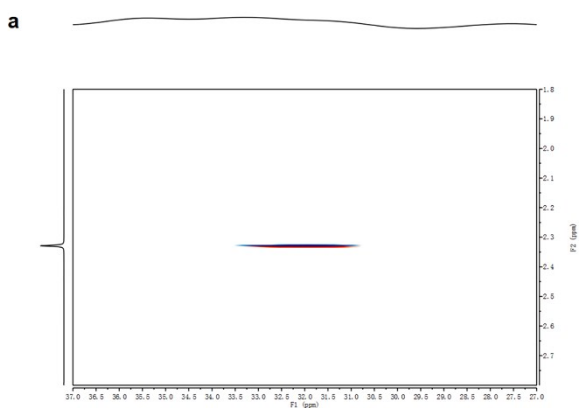

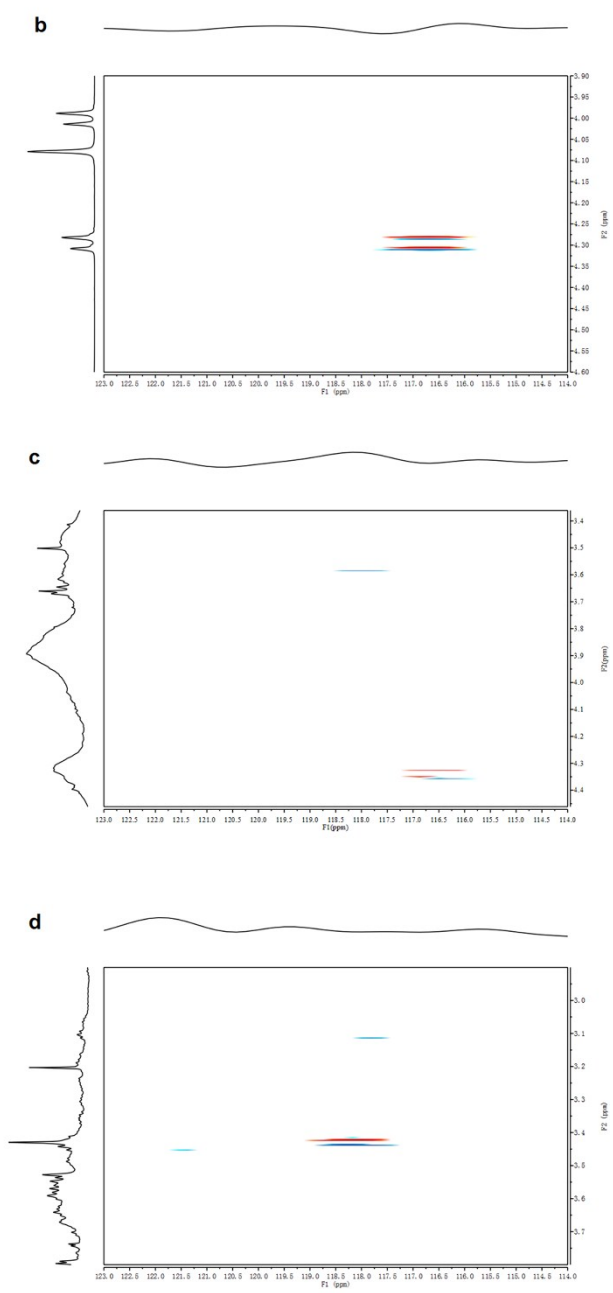

Fig. S2  $^{15}\text{N}$  NMR spectra of EDTA (a), EDTA-NO (b), PEI-NO (c) and PEI-NO-Y (III) (d) in  $\text{D}_2\text{O}$ .

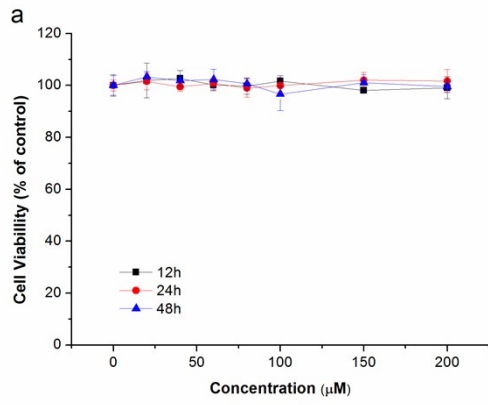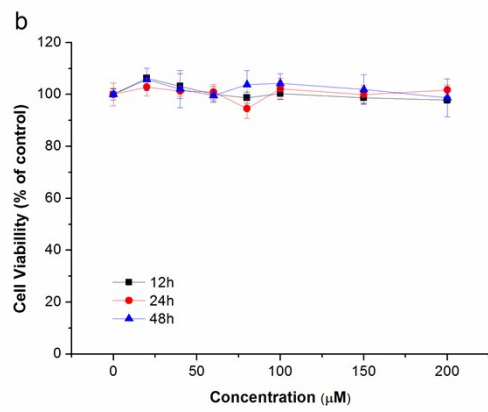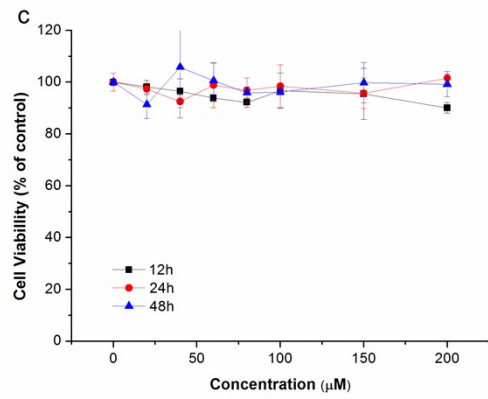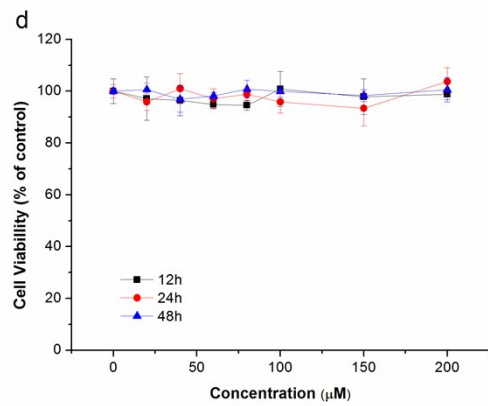

Fig. S3 Relative cell viability [%] of HeLa after treatment with (a) HPEI-NO-Gd-1200, (b) HPEI-NO-Gd-1800, (c) HPEI-NO-Gd-10000 and (d) LPEI-NO-Gd-10000.
